# Supplementary material for: Critical Role of the Sulfiredoxin-Peroxiredoxin IV Axis in Urethane-Induced Non-Small Cell Lung Cancer
Source: MDPI journal article supplement (doi:10.3390/antiox12020367), 2023-02-03
Supplement: s1 [file s1]

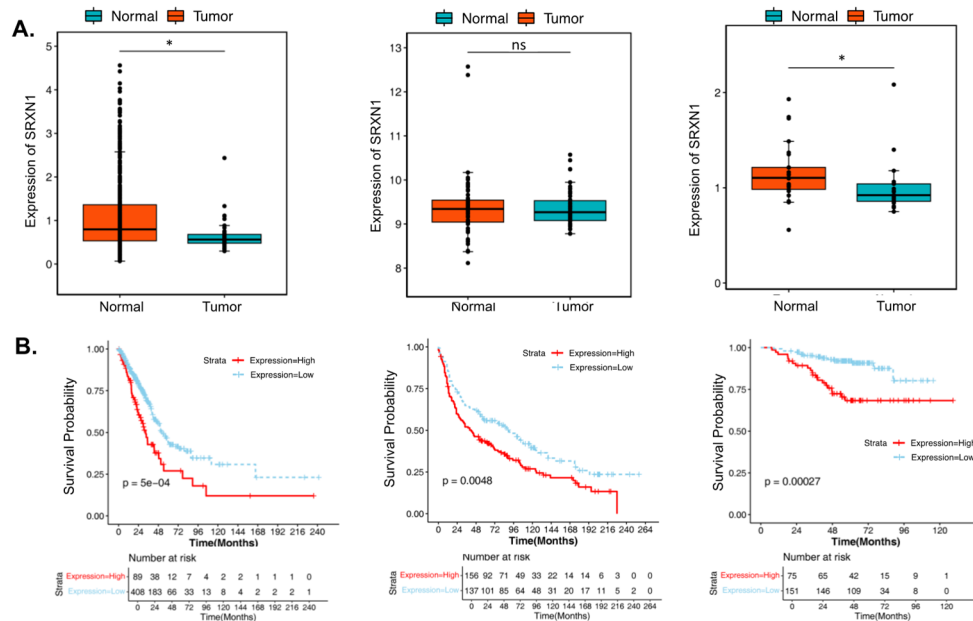

**Figure S1.** SRXN1 is up-regulated in lung adenocarcinoma, and negatively related to prognosis. (A) The expression level of SRXN1 between LUAD tumor and normal groups from TCGA-LUAD, GSE19804, and GSE27262 datasets. (B) K-M survival curves of SRXN1 expression in LUAD patients. (\*,  $p < 0.05$ ; ns,  $p \geq 0.05$ ).

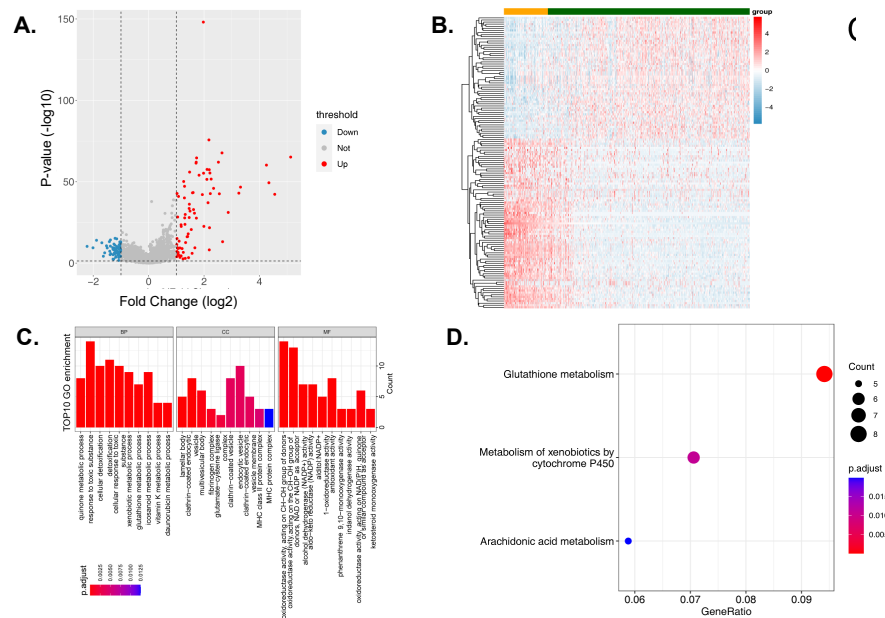

**Figure S2.** Identification and exploration of DEGs between the high- and low-expression groups of SRXN1. (A,B). Volcano plot and heatmap of DEGs in LUAD cohort (adj.P.Value < 0.05 and  $|\log_2 \text{fold change}| > 1$ ). (C,D). Bubble charts of the GO and KEGG enrichment analyses.

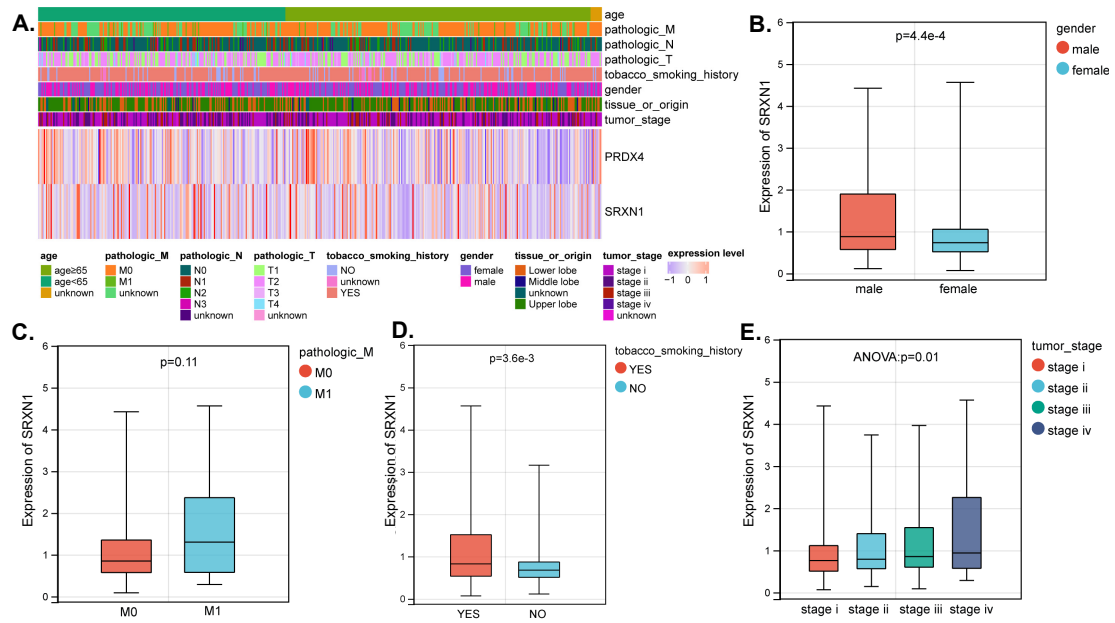

**Figure S3.** The correlation analysis of SRXN1 expression and different clinical features.(A). SRXN1 and Prx4 expression in LUAD cohort with different clinical features.(B). Boxplot of SRXN1 expression in LUAD cohort with different gender, pathologic M, tobacco smoking history, and tumor stage.

**Table S1.** Clinical characteristic of LUAD patients between the high- and low-expression groups of SRXN1.

| FEATURES                | HIGH SRXN1<br>(N=89) | LOW<br>SRXN1(N=408) | P.VALUE  |
|-------------------------|----------------------|---------------------|----------|
| age                     |                      |                     | 0.9796   |
| age<65                  | 40                   | 178                 |          |
| age≥65                  | 48                   | 221                 |          |
| pathologic_M            |                      |                     | 0.002377 |
| M0                      | 59                   | 272                 |          |
| M1                      | 11                   | 13                  |          |
| pathologic_N            |                      |                     | 0.1122   |
| N0                      | 49                   | 272                 |          |
| N1                      | 22                   | 72                  |          |
| N2                      | 17                   | 52                  |          |
| N3                      | 0                    | 2                   |          |
| pathologic_T            |                      |                     | 0.9074   |
| T1                      | 30                   | 136                 |          |
| T2                      | 46                   | 221                 |          |
| T3                      | 8                    | 35                  |          |
| T4                      | 4                    | 14                  |          |
| tobacco_smoking_history |                      |                     | 0.02913  |
| NO                      | 6                    | 65                  |          |
| YES                     | 83                   | 329                 |          |

|                  |    |     |           |
|------------------|----|-----|-----------|
| gender           |    |     | 3.342e-05 |
| female           | 30 | 239 |           |
| male             | 59 | 169 |           |
| tissue_or_origin |    |     | 0.6106    |
| Lower lobe       | 28 | 140 |           |
| Middle lobe      | 2  | 19  |           |
| Upper lobe       | 54 | 237 |           |
| tumor_stage      |    |     | 0.003266  |
| stage i          | 37 | 230 |           |
| stage ii         | 22 | 96  |           |
| stage iii        | 17 | 63  |           |
| stage iv         | 11 | 14  |           |

---
